# Supplementary material for: Bovine Viral Diarrhea Virus (BVDV): A Preliminary Study on Antiviral Properties of Some Aromatic and Medicinal Plants
Source: PubMed Central journal article supplement (PMC8066157; doi:10.3390/pathogens10040403), 2021-03-29
Supplement: pathogens-10-00403-s001.pdf [file pathogens-10-00403-s001.pdf]

**Table S1.** Cytotoxicity and antiviral activity of Essential oils and reference compounds against representatives of ssRNA<sup>+</sup> (HIV-1, BVDV, DENV-2, WNV, YFV, CV-B5, Sb-1), ssRNA<sup>-</sup> (RSV, VSV), and dsDNA (VV, HSV-1) viruses.

| Compds                                        | MT-4                          | HIV-1                         | MDBK                          | BVDV                          | BHK                           | DENV-2                        | WNV                           | YFV                           | Vero76                        | CV-B5                         | Sb-1                          | RSV                           | VSV                           | VV                            | HSV-1                         |
|-----------------------------------------------|-------------------------------|-------------------------------|-------------------------------|-------------------------------|-------------------------------|-------------------------------|-------------------------------|-------------------------------|-------------------------------|-------------------------------|-------------------------------|-------------------------------|-------------------------------|-------------------------------|-------------------------------|
|                                               | <sup>a</sup> CC <sub>50</sub> | <sup>b</sup> EC <sub>50</sub> | <sup>c</sup> CC <sub>50</sub> | <sup>d</sup> EC <sub>50</sub> | <sup>e</sup> CC <sub>50</sub> | <sup>f</sup> EC <sub>50</sub> | <sup>g</sup> EC <sub>50</sub> | <sup>h</sup> EC <sub>50</sub> | <sup>i</sup> CC <sub>50</sub> | <sup>j</sup> EC <sub>50</sub> | <sup>k</sup> EC <sub>50</sub> | <sup>l</sup> EC <sub>50</sub> | <sup>m</sup> EC <sub>50</sub> | <sup>n</sup> EC <sub>50</sub> | <sup>o</sup> EC <sub>50</sub> |
| <i>Lavandula angustifolia</i>                 | >100                          | >100                          | >100                          | >100                          | >100                          | >100                          | >100                          | >100                          | >100                          | >100                          | >100                          | >100                          | >100                          | >100                          | >100                          |
| <i>Foeniculum vulgare</i>                     | >100                          | >100                          | >100                          | >100                          | >100                          | >100                          | >100                          | >100                          | >100                          | >100                          | <b>100</b>                    | >100                          | >100                          | >100                          | >100                          |
| <i>Salvia officinalis</i>                     | >100                          | >100                          | >100                          | <b>50±3</b>                   | >100                          | >100                          | >100                          | >100                          | >100                          | >100                          | >100                          | >100                          | >100                          | >100                          | >100                          |
| <i>Myrtus communis</i>                        | >100                          | >100                          | >100                          | >100                          | >100                          | >100                          | >100                          | >100                          | >100                          | >100                          | >100                          | >100                          | >100                          | >100                          | >100                          |
| <i>Pistacia lentiscus</i>                     | >100                          | >100                          | >100                          | >100                          | >100                          | >100                          | >100                          | >100                          | >100                          | >100                          | >100                          | >100                          | >100                          | >100                          | >100                          |
| <i>Eucalyptus globulus</i>                    | >100                          | >100                          | >100                          | >100                          | >100                          | >100                          | >100                          | >100                          | >100                          | >100                          | >100                          | >100                          | >100                          | >100                          | >100                          |
| <i>Laurus nobilis</i>                         | >100                          | >100                          | >100                          | >100                          | >100                          | >100                          | >100                          | >100                          | >100                          | >100                          | >100                          | >100                          | >100                          | >100                          | >100                          |
| <i>Helichrysum italicum ssp. microphyllum</i> | >100                          | >100                          | >100                          | >100                          | >100                          | >100                          | >100                          | >100                          | ≥100                          | >100                          | >100                          | >100                          | >100                          | >100                          | >100                          |
| <i>Satureja thymbra</i>                       | >100                          | >100                          | >100                          | >100                          | >100                          | >100                          | >100                          | >100                          | ≥100                          | >100                          | >100                          | >100                          | >100                          | >100                          | >100                          |
| <b>*Reference Compounds</b>                   |                               |                               |                               |                               |                               |                               |                               |                               |                               |                               |                               |                               |                               |                               |                               |
| Efavirenz                                     | 40                            | <b>0.002</b>                  |                               |                               |                               |                               |                               |                               |                               |                               |                               |                               |                               |                               |                               |
| Pleconaril                                    |                               |                               |                               |                               |                               |                               |                               |                               | >100                          | 0.005                         |                               |                               |                               |                               |                               |
| 2'-C-Me-Gua                                   |                               |                               | >100                          | <b>1.6</b>                    | 60.0                          | <b>0.3</b>                    | <b>0.4</b>                    | <b>1.2</b>                    |                               |                               |                               |                               |                               |                               |                               |
| 6-Aza-Uridine                                 |                               |                               |                               |                               |                               |                               |                               |                               | 4.0                           |                               |                               | 1.0                           |                               |                               |                               |
| Mycophen.Ac.                                  |                               |                               |                               |                               |                               |                               |                               |                               | 20                            |                               |                               |                               |                               | <b>1.5</b>                    |                               |
| AcycloGuo                                     |                               |                               |                               |                               |                               |                               |                               |                               |                               |                               |                               |                               |                               |                               |                               |

- <sup>a</sup> Compd concn (µg/ml) required to reduce by 50 % the proliferation of mock-infected MT-4 cells, as determined by the MTT method.
- <sup>b</sup> Compd concn (µg/ml) required to achieve 50 % protection of MT-4 cells from HIV-1-induced cytopathogenicity, as determined by the MTT method.
- <sup>c</sup> Compd concn (µg/ml) required to reduce by 50 % the viability of mock-infected MDBK cells, as determined by the MTT method.
- <sup>d</sup> Compd concn (µg/ml) required to achieve 50 % protection of MDBK cells from BVDV-induced cytopathogenicity, as determined by the MTT method.
- <sup>e</sup> Compd concn (µg/ml) required to reduce by 50 % the viability of mock-infected BHK cells, as determined by the MTT method.
- <sup>f-h</sup> Compd concn (µg/ml) required to achieve 50 % protection of BHK cells from DENV-2<sup>(f)</sup>-, WNV<sup>(g)</sup>-, YFV<sup>(h)</sup>-induced cytopathogenicity, as determined by the MTT method.
- <sup>i</sup> Compd concn (µg/ml) required to reduce by 50 % the viability of mock-infected Vero-76 cells, as determined by the MTT method.
- <sup>j-o</sup> Compd concn (µg/ml) required to reduce by 50 % the plaque number of CV-B5<sup>(j)</sup>, Sb-1<sup>(k)</sup>, RSV<sup>(l)</sup>, VSV<sup>(m)</sup>, VV<sup>(n)</sup>, HSV-1<sup>(o)</sup> in Vero-76 cells.
- \*Reference Compounds (µM)
